# Supplementary material for: Aberrant MicroRNA Expression and Its Implications for Uveal Melanoma Metastasis
Source: PubMed Central journal article supplement (PMC6628189; doi:10.3390/cancers11060815), 2019-06-12
Supplement: cancers-11-00815-s001.pdf [file cancers-11-00815-s001.pdf]

# Supplementary Materials: Aberrant MicroRNA Expression and Its Implications for Uveal Melanoma Metastasis

Kyra N. Smit, Jiang Chang, Kasper Derks, Jolanda Vaarwater, Tom Brands, Rob M. Verdiijk, Erik A.C. Wiemer, Hanneke W. Mensink, Joris Pothof, Annelies de Klein and Emine Kilic

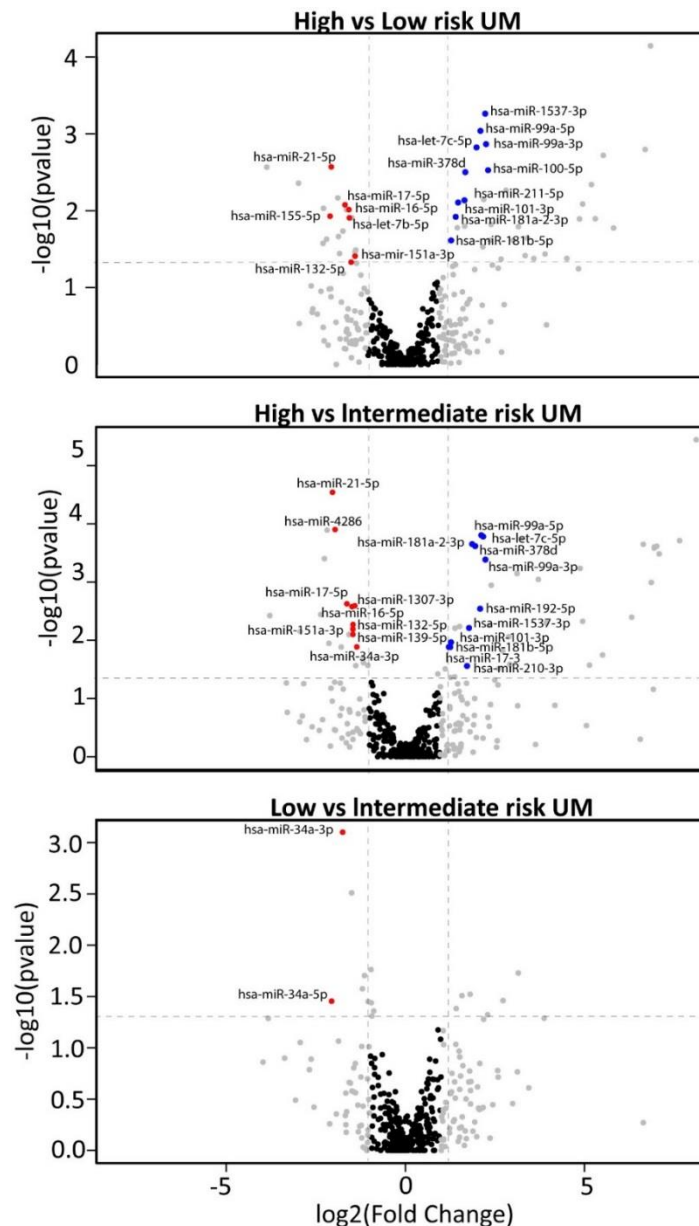

**Figure S1.** Volcano plots indicating the differentially expressed miRNAs between high vs low-risk UM, high vs intermediate-risk UM and low vs intermediate-risk UM.

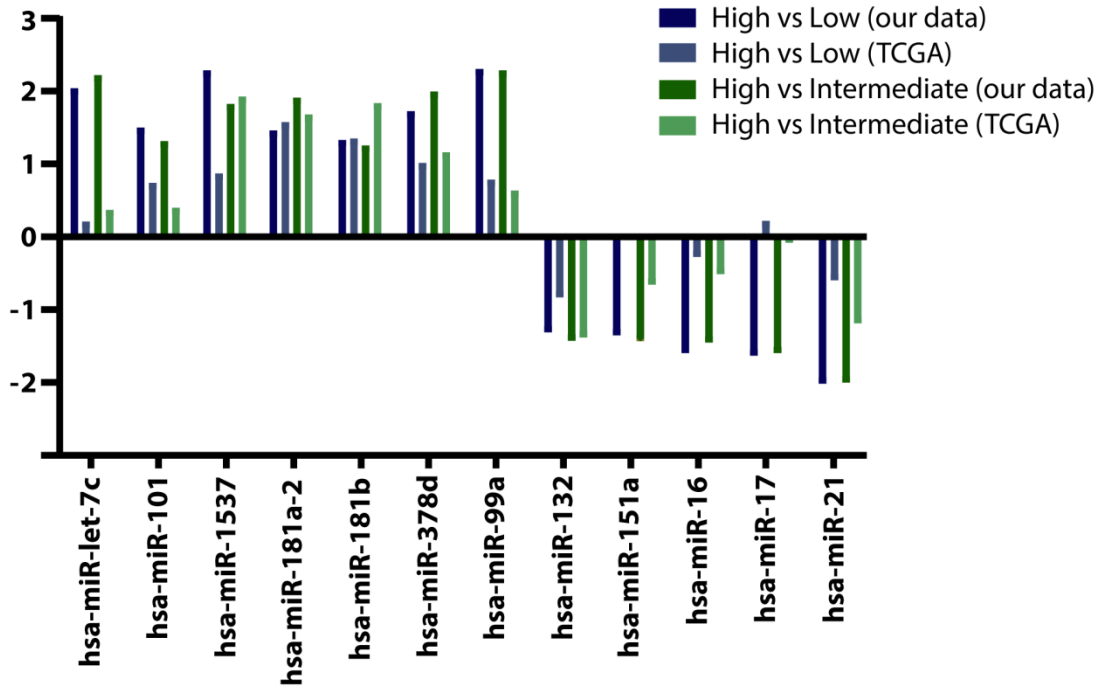

Figure S2. miRNA expression analysis of TCGA cohort.

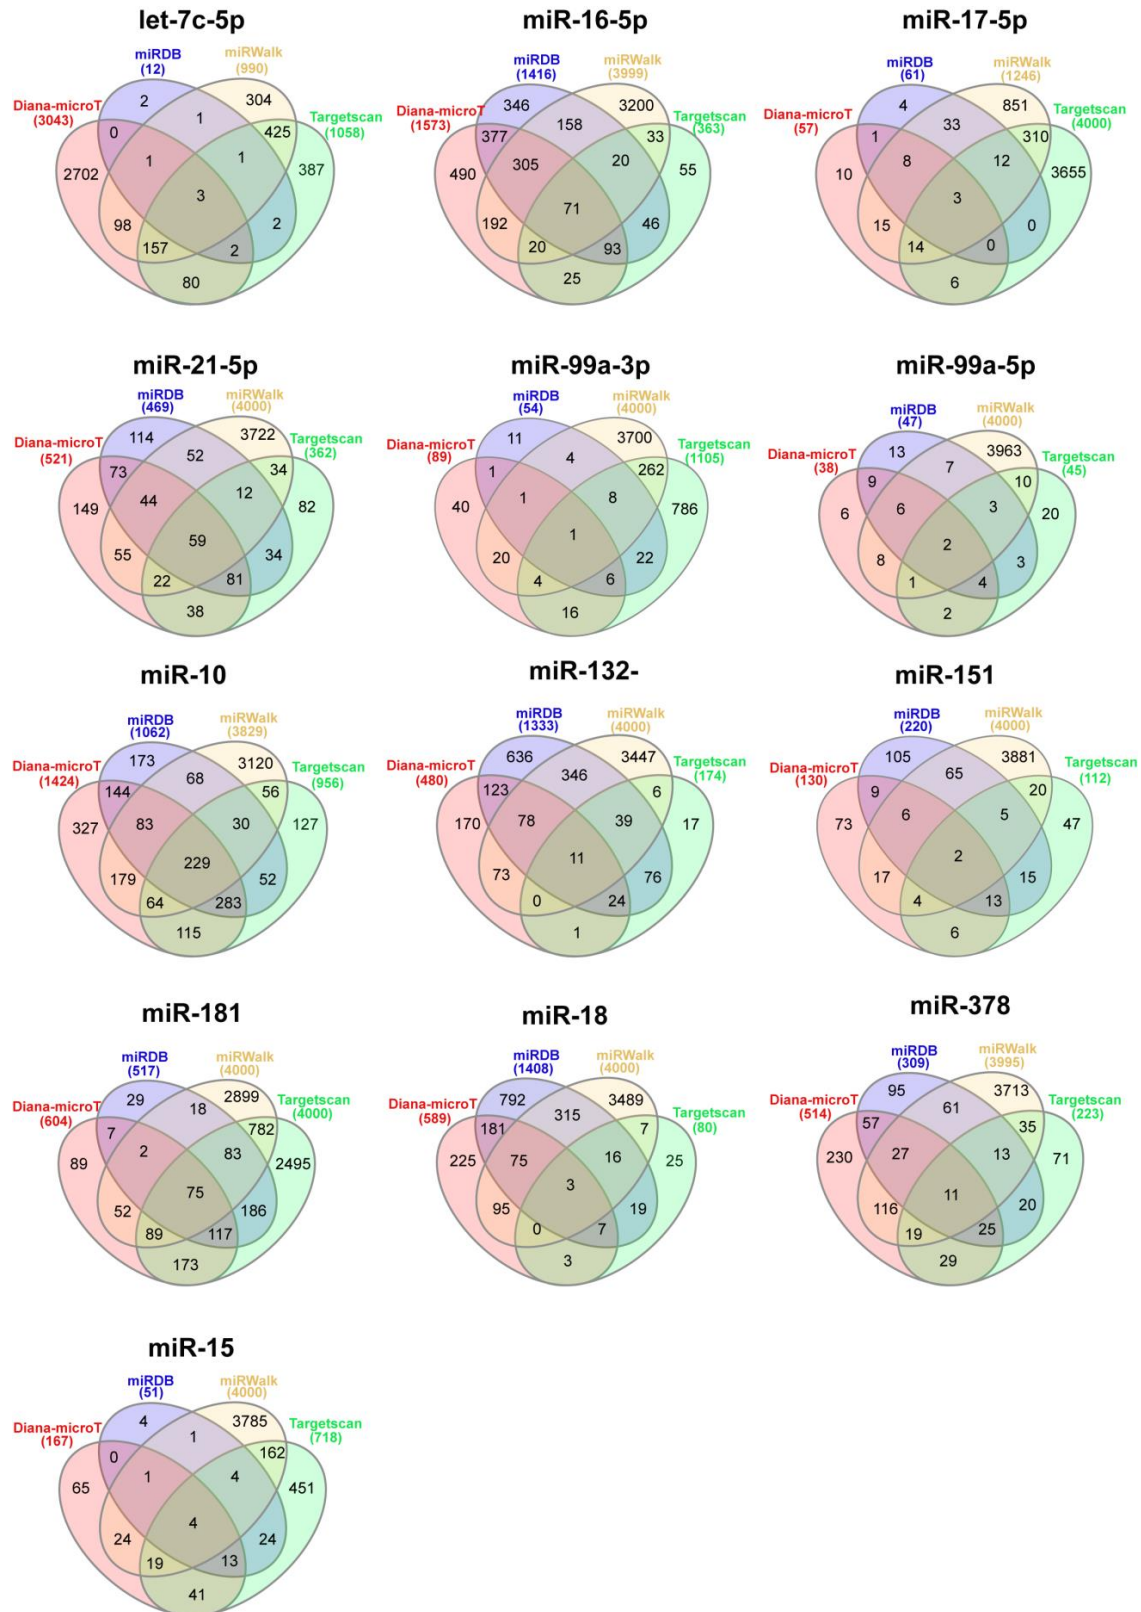

**Figure S3.** Overlap in the target genes predicted by four different algorithms (Diana, miRDB, miRWalk and Targetscan).

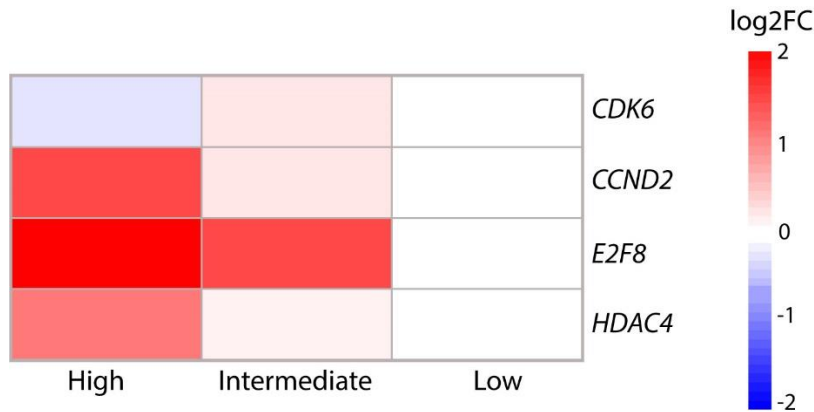

**Figure S4.** Heatmap showing the differential expression of the four cell-cycle related genes; CDK6, CCND2, E2F8 and HDAC4.

**Table S1.** IPA target analysis.

| Ingenuity Canonical Pathways                        | $-\log(p\text{-Value})$ | Molecules                                   |
|-----------------------------------------------------|-------------------------|---------------------------------------------|
| Chronic Myeloid Leukemia Signaling                  | 3,63E00                 | FGFR3,HDAC4,PTPN11,CDK6,E2F8                |
| Cell Cycle: G1/S Checkpoint Regulation              | 3,53E00                 | HDAC4,CCND2,CDK6,E2F8                       |
| Osteoarthritis Pathway                              | 3,27E00                 | FGFR3,VEGFA,TIMP3,HDAC4,FGF2,MEF2C          |
| Cyclins and Cell Cycle Regulation                   | 3,22E00                 | HDAC4,CCND2,CDK6,E2F8                       |
| Role of NFAT in Cardiac Hypertrophy                 | 3,1E00                  | FGFR3,HDAC4,PTPN11,CACNB4,MEF2C,ITPR1       |
| Non-Small Cell Lung Cancer Signaling                | 3,08E00                 | FGFR3,PTPN11,CDK6,ITPR1                     |
| Type II Diabetes Mellitus Signaling                 | 3,06E00                 | FGFR3,PTPN11,CACNB4,ACSL6,NSMAF             |
| FGF Signaling                                       | 3,01E00                 | FGFR3,PTPN11,FGF2,ITPR1                     |
| Endocannabinoid Cancer Inhibition Pathway           | 3,01E00                 | FGFR3,VEGFA,CCND2,PTPN11,NSMAF              |
| Glioblastoma Multiforme Signaling                   | 2,77E00                 | FGFR3,PTPN11,CDK6,ITPR1,E2F8                |
| Nitric Oxide Signaling in the Cardiovascular System | 2,65E00                 | FGFR3,VEGFA,PTPN11,ITPR1                    |
| Pancreatic Adenocarcinoma Signaling                 | 2,53E00                 | FGFR3,VEGFA,PTPN11,E2F8                     |
| Glioma Signaling                                    | 2,52E00                 | FGFR3,PTPN11,CDK6,E2F8                      |
| Apelin Endothelial Signaling Pathway                | 2,46E00                 | FGFR3,HDAC4,PTPN11,MEF2C                    |
| Leukocyte Extravasation Signaling                   | 2,45E00                 | FGFR3,TIMP3,CLDN11,PTPN11,RDX               |
| GP6 Signaling Pathway                               | 2,4E00                  | FGFR3,PTPN11,COL24A1,ITPR1                  |
| EGF Signaling                                       | 2,34E00                 | FGFR3,PTPN11,ITPR1                          |
| Corticotropin Releasing Hormone Signaling           | 2,31E00                 | VEGFA,CACNB4,MEF2C,ITPR1                    |
| EIF2 Signaling                                      | 2,3E00                  | FGFR3,VEGFA,MYCN,PTPN11,AGO4                |
| CNTF Signaling                                      | 2,28E00                 | FGFR3,LIFR,PTPN11                           |
| Heparan Sulfate Biosynthesis (Late Stages)          | 2,24E00                 | HS3ST3B1,EXTL3,HS3ST5                       |
| Hereditary Breast Cancer Signaling                  | 2,19E00                 | FGFR3,HDAC4,PTPN11,CDK6                     |
| Heparan Sulfate Biosynthesis                        | 2,14E00                 | HS3ST3B1,EXTL3,HS3ST5                       |
| Small Cell Lung Cancer Signaling                    | 2,08E00                 | FGFR3,PTPN11,CDK6                           |
| GDNF Family Ligand-Receptor Interactions            | 2,08E00                 | FGFR3,PTPN11,ITPR1                          |
| Neurotrophin/TRK Signaling                          | 2,07E00                 | FGFR3,PTPN11,SPRY1                          |
| FcγRIIB Signaling in B Lymphocytes                  | 2,04E00                 | FGFR3,PTPN11,CACNB4                         |
| Glioma Invasiveness Signaling                       | 2,04E00                 | FGFR3,TIMP3,PTPN11                          |
| Gαq Signaling                                       | 2,03E00                 | FGFR3,PTPN11,RGS16,ITPR1                    |
| eNOS Signaling                                      | 2,02E00                 | FGFR3,VEGFA,PTPN11,ITPR1                    |
| Cardiac Hypertrophy Signaling (Enhanced)            | 2,01E00                 | FGFR3,HDAC4,PTPN11,FGF2,TNFSF15,MEF2C,ITPR1 |

|                                                             |         |                                    |
|-------------------------------------------------------------|---------|------------------------------------|
| Renal Cell Carcinoma Signaling                              | 2       | FGFR3,VEGFA,PTPN11                 |
| Bladder Cancer Signaling                                    | 1,95E00 | FGFR3,VEGFA,FGF2                   |
| HER-2 Signaling in Breast Cancer                            | 1,93E00 | FGFR3,PTPN11,CDK6                  |
| VEGF Family Ligand-Receptor Interactions                    | 1,93E00 | FGFR3,VEGFA,PTPN11                 |
| Ceramide Signaling                                          | 1,87E00 | FGFR3,PTPN11,NSMAF                 |
| Role of NFAT in Regulation of the Immune Response           | 1,84E00 | FGFR3,PTPN11,MEF2C,ITPR1           |
| B Cell Receptor Signaling                                   | 1,84E00 | FGFR3,PTPN11,PAG1,MEF2C            |
| Xenobiotic Metabolism Signaling                             | 1,83E00 | FGFR3,HS3ST3B1,HDAC4,PTPN11,HS3ST5 |
| FAK Signaling                                               | 1,81E00 | FGFR3,PTPN11,ASAP1                 |
| Amyotrophic Lateral Sclerosis Signaling                     | 1,78E00 | FGFR3,VEGFA,PTPN11                 |
| p53 Signaling                                               | 1,78E00 | FGFR3,CCND2,PTPN11                 |
| Calcium Signaling                                           | 1,77E00 | HDAC4,CACNB4,MEF2C,ITPR1           |
| UVA-Induced MAPK Signaling                                  | 1,77E00 | FGFR3,PTPN11,PARP8                 |
| VEGF Signaling                                              | 1,77E00 | FGFR3,VEGFA,PTPN11                 |
| Clathrin-mediated Endocytosis Signaling                     | 1,76E00 | FGFR3,VEGFA,PTPN11,FGF2            |
| Apelin Cardiomyocyte Signaling Pathway                      | 1,76E00 | FGFR3,PTPN11,ITPR1                 |
| Neuropathic Pain Signaling In Dorsal Horn Neurons           | 1,74E00 | FGFR3,PTPN11,ITPR1                 |
| Mouse Embryonic Stem Cell Pluripotency                      | 1,74E00 | FGFR3,LIFR,PTPN11                  |
| IL-8 Signaling                                              | 1,71E00 | FGFR3,VEGFA,CCND2,PTPN11           |
| Breast Cancer Regulation by Stathmin1                       | 1,71E00 | FGFR3,PTPN11,ITPR1,E2F8            |
| Role of p14/p19ARF in Tumor Suppression                     | 1,71E00 | FGFR3,PTPN11                       |
| T Cell Receptor Signaling                                   | 1,71E00 | FGFR3,PTPN11,PAG1                  |
| Synaptogenesis Signaling Pathway                            | 1,7E00  | FGFR3,PTPN11,SYT3,CACNB4,ITPR1     |
| Dermatan Sulfate Biosynthesis (Late Stages)                 | 1,69E00 | HS3ST3B1,HS3ST5                    |
| Telomerase Signaling                                        | 1,69E00 | FGFR3,HDAC4,PTPN11                 |
| IL-9 Signaling                                              | 1,68E00 | FGFR3,PTPN11                       |
| Paxillin Signaling                                          | 1,67E00 | FGFR3,PTPN11,ITGA8                 |
| CREB Signaling in Neurons                                   | 1,67E00 | FGFR3,PTPN11,CACNB4,ITPR1          |
| iCOS-iCOSL Signaling in T Helper Cells                      | 1,66E00 | FGFR3,PTPN11,ITPR1                 |
| Chondroitin Sulfate Biosynthesis (Late Stages)              | 1,64E00 | HS3ST3B1,HS3ST5                    |
| Myo-inositol Biosynthesis                                   | 1,63E00 | IMPA1                              |
| HIF1 $\alpha$ Signaling                                     | 1,63E00 | FGFR3,VEGFA,PTPN11                 |
| Integrin Signaling                                          | 1,62E00 | FGFR3,PTPN11,ASAP1,ITGA8           |
| fMLP Signaling in Neutrophils                               | 1,6E00  | FGFR3,PTPN11,ITPR1                 |
| Actin Cytoskeleton Signaling                                | 1,59E00 | FGFR3,PTPN11,FGF2,RDX              |
| Renin-Angiotensin Signaling                                 | 1,59E00 | FGFR3,PTPN11,ITPR1                 |
| Role of NANOG in Mammalian Embryonic Stem Cell Pluripotency | 1,59E00 | FGFR3,LIFR,PTPN11                  |
| CD28 Signaling in T Helper Cells                            | 1,58E00 | FGFR3,PTPN11,ITPR1                 |
| Adipogenesis pathway                                        | 1,58E00 | FGFR3,HDAC4,FGF2                   |
| Role of Tissue Factor in Cancer                             | 1,58E00 | FGFR3,VEGFA,PTPN11                 |
| STAT3 Pathway                                               | 1,58E00 | FGFR3,VEGFA,FGF2                   |
| Docosahexaenoic Acid (DHA) Signaling                        | 1,56E00 | FGFR3,PTPN11                       |
| IL-6 Signaling                                              | 1,54E00 | FGFR3,VEGFA,PTPN11                 |
| CCR3 Signaling in Eosinophils                               | 1,53E00 | FGFR3,PTPN11,ITPR1                 |
| Chondroitin Sulfate Biosynthesis                            | 1,52E00 | HS3ST3B1,HS3ST5                    |
| Dermatan Sulfate Biosynthesis                               | 1,49E00 | HS3ST3B1,HS3ST5                    |
| Apelin Pancreas Signaling Pathway                           | 1,49E00 | FGFR3,PTPN11                       |
| Huntington's Disease Signaling                              | 1,49E00 | FGFR3,HDAC4,PTPN11,ITPR1           |

---

|                                                                                 |         |                                            |
|---------------------------------------------------------------------------------|---------|--------------------------------------------|
| Axonal Guidance Signaling                                                       | 1,49E00 | FGFR3,VEGFA,NTNG1,PTPN11,SRGAP1,<br>LINGO1 |
| Gα12/13 Signaling                                                               | 1,49E00 | FGFR3,PTPN11,MEF2C                         |
| Human Embryonic Stem Cell Pluripotency                                          | 1,48E00 | FGFR3,PTPN11,FGF2                          |
| IL-23 Signaling Pathway                                                         | 1,48E00 | FGFR3,PTPN11                               |
| Ephrin A Signaling                                                              | 1,45E00 | FGFR3,PTPN11                               |
| Ovarian Cancer Signaling                                                        | 1,42E00 | FGFR3,VEGFA,PTPN11                         |
| Pyridoxal 5'-phosphate Salvage Pathway                                          | 1,42E00 | PRPF4B,CDK6                                |
| Melanoma Signaling                                                              | 1,4E00  | FGFR3,PTPN11                               |
| UVB-Induced MAPK Signaling                                                      | 1,38E00 | FGFR3,PTPN11                               |
| Lymphotoxin β Receptor Signaling                                                | 1,37E00 | FGFR3,PTPN11                               |
| Relaxin Signaling                                                               | 1,37E00 | FGFR3,VEGFA,PTPN11                         |
| Molecular Mechanisms of Cancer                                                  | 1,37E00 | FGFR3,CCND2,PTPN11,CDK6,E2F8               |
| Role of IL-17A in Arthritis                                                     | 1,36E00 | FGFR3,PTPN11                               |
| ERK5 Signaling                                                                  | 1,34E00 | PTPN11,MEF2C                               |
| Regulation of eIF4 and p70S6K Signaling                                         | 1,34E00 | FGFR3,PTPN11,AGO4                          |
| Role of Pattern Recognition Receptors in<br>Recognition of Bacteria and Viruses | 1,33E00 | FGFR3,PTPN11,TNFSF15                       |
| PKCθ Signaling in T Lymphocytes                                                 | 1,32E00 | FGFR3,PTPN11,CACNB4                        |
| MSP-RON Signaling Pathway                                                       | 1,32E00 | FGFR3,PTPN11                               |
| Thrombopoietin Signaling                                                        | 1,3E00  | FGFR3,PTPN11                               |
| Endometrial Cancer Signaling                                                    | 1,3E00  | FGFR3,PTPN11                               |
| IL-2 Signaling                                                                  | 1,3E00  | FGFR3,PTPN11                               |
| Aldosterone Signaling in Epithelial Cells                                       | 1,3E00  | FGFR3,PTPN11,ITPR1                         |

---
